# Supplementary material
Source: publisher figshare collection journal article supplement (https://karger.figshare.com/ndownloader/files/34840254)
Supplement: Supplementary file 1 [file 34840254]

***Supplementary file*** *Survey questions*

*1. Is kidney replacement therapy (Continuous kidney replacement therapy (CKRT) or hemodialysis (HD)) being performed in the ICU at the hospital you (mainly) work at?*

- Yes
- No
- Other

*2. Which form of kidney replacement therapy is available for ICU patients with AKI in the hospital you (mainly) work at?*

- CVVH(DF)
- Hemodialysis (HD)
- Both CVVH(DF) and hemodialysis
- Other

*3. Are you actively involved in the decision making regarding stopping acute kidney replacement therapy?*

- Yes
- No
- Other

4. *How many times a year are you actively involved in the decision to stop acute kidney replacement therapy?*

- 0 times
- <5 times
- 6-10 times
- 11-20 times
- >20 times
- Don't know

*5. What is your position?*

- Nephrologist
- Intensivist
- Other

*6. How many years have you worked in your position stated in question 5?*

- <2 years
- 2-5 years
- 6-10 years
- >10 years

*7. How many ICU beds are available in the hospital you are mainly working at?*

- <5
- 6-8
- 9-11
- 12-15
- 16-19
- >19

*8. The hospital you mainly work is a(n)*

- University hospital
- General hospital
- Other

*9. How many ICU patients with AKI receive acute kidney replacement therapy in the hospital you (mainly) work at, annually?*

- <10
- 11-30
- 31-50
- >50
- Don't know

10. *Which method is used to determine the kidney function in the ICU for the hospital you (mainly) work at? You can select multiple answers*

- Serum creatinine
- 24-hour urinary creatinine
- Estimated GFR (eGFR) Chronic Kidney Disease Epidemiology Collaboration (CKD-EPI) formula
- Estimated GFR (eGFR) Modification of Diet in Renal Disease (MDRD) formula
- Other

*11. Please give an estimate for the hospital you (mainly) work at on how many times the CKRT is reinitiated within 72 hours after stopping the initial treatment.*

- Never
- 1-10%
- 11-20%
- 21-40%
- 41-60%
- 61-80%
- 81-100%
- Don't know

*Which of the following parameter(s) do you use to assess whether the kidney replacement therapy can be stopped in ICU patients with AKI?*

*12. Absence of fluid overload*

- No
- Yes

*13. Serum cystatin C*

- No
- Yes

*14. NGAL*

- No
- Yes

*15. A spontaneous rise in urine production*

- No
- Yes
  - *16. At which spontaneous urine production do you think that the kidney function replacement therapy can be stopped? This question can be answered in mL/kg/hrs, as well as the total amount per 24 hours.*
    - 0.25ml/kg/h
    - 0.5ml/kg/h
    - 1-2ml/kg/h
    - >2ml/kg/h
    - >400ml/dag
    - >1000ml/dag
    - Other

*17. Rise in urine production after administration of diuretics*

- No
- Yes
  - *18. When you assess the diuresis after administering diuretics, which minimal diuresis do you think is sufficient to quit the kidney replacement therapy?*
    - >500ml/day
    - >1000ml/day
    - >1500mL/day
    - >2000ml/day
    - >2500ml/day
    - Other
- *19. Improvement of the creatinine clearance*
- No
- Yes
  - *20. From which minimal calculated creatinine clearance can the kidney replacement therapy be permanently stopped in IC patients with AKI?*
    - >10ml/min
    - >15ml/min
    - >20ml/min
    - >25ml/min
    - I cannot estimate this

*21. When a patient meets one or more criteria for the cessation of CKRT, when should the treatment be discontinued?*

- Immediately
- After failure or disconnection of the CKRT system due to, e.g. surgery or diagnostic procedures, or after expiration of the CKRT filter
- Other

*22. In an ICU-patient with no prior history of dialysis, when would you consider switching from CKRT to regular haemodialysis? More than one answer is possible.*

- No need for vasopressor treatment during CKRT
- Absence of fluid overload
- I will just try to stop CKRT. If unsuccessful, then CKRT will be restarted.
- (Imminent) discharge of ICU
- Increased mobility of the patient
- No recovery of diuresis
- Lack of CKRT machines
- I cannot estimate this
- Other

*23. Please state any comments in response to this survey below.*
